# Supplementary material
Source: Research Square preprint supplement (doi:10.21203/rs.3.rs-9616322/v1)
Supplement: Supplementary file 1 [file dba05168c276cfe80d04b43e.docx]

**Table 1:** Lead ten compounds with control drug Binding affinity.

| **Name with CID** | **2D structure** | **PyRx Docking Score (Kcal/mol)** | **Maestro Binding Affinity (Kcal/mol)** |
| --- | --- | --- | --- |
| Luteolin, (CID 5280445) | 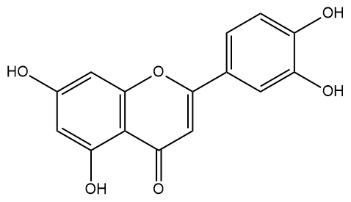 | -10.4 | -10.2 |
| Quercetin (CID-5280343) | 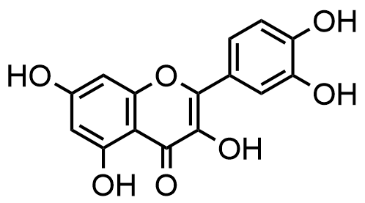 | -10.1 | -10.0 |
| Rutin (CID 5280805) | 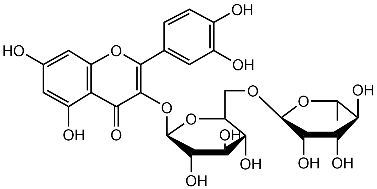 | -10.0 | -9.8 |
| Kaempferol (CID-5280863) | 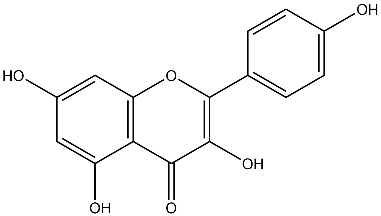 | -9.8 | -9.7 |
| (-)-Epicatechin (CID 72276) | 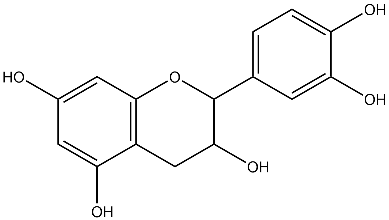 | -9.7 | -9.5 |
| Ellagic acid (CID 5281855) | 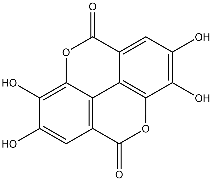 | -9.4 | -9.3 |
| Flavogallonic acid (CID 14503023) | 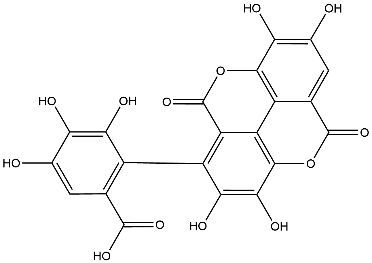 | -9.3 | -9.0 |
| Astragalin (CID 5282102) | 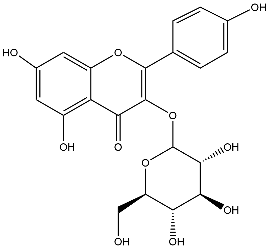 | -8.7 | -8.4 |
| Methyl brevifolin carboxylate (CID 5319518) | 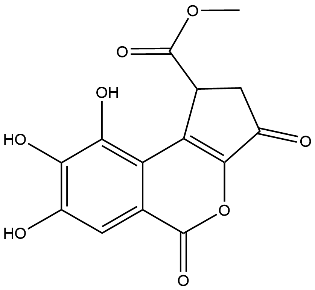 | -8.4 | -8.2 |
| Isoscopoletin (CID 69894) | 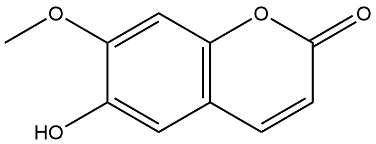 | -8.0 | -8.0 |
| Mitoxantrone (CID 4212) (Control) | 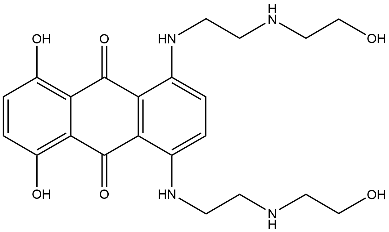 | -8.5 | -8.5 |
